# Supplementary material for: Interaction of porcine reproductive and respiratory syndrome virus proteins with SUMO-conjugating enzyme reveals the SUMOylation of nucleocapsid protein
Source: PubMed Central journal article supplement (PMC5728522; doi:10.1371/journal.pone.0189191), 2017-12-13

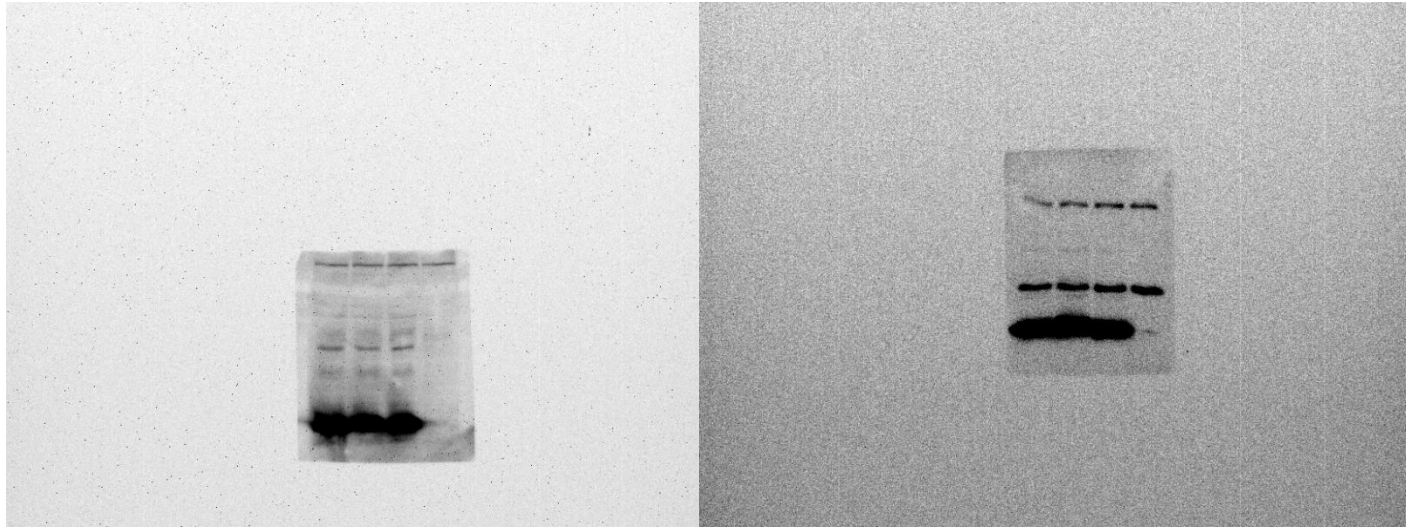

**S3 Fig.** The original pictures of Fig 5C

# S4 Fig

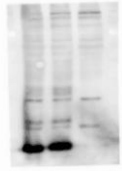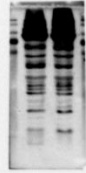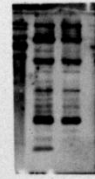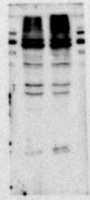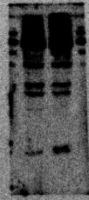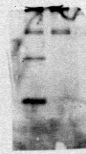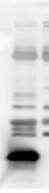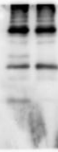

Supplement: pone.0189191.s003.pdf [file pone.0189191.s003.pdf]
